# Supplementary material for: Solvothermal synthesis of magnetic CoFe2O4/rGO nanocomposites for highly efficient dye removal in wastewater
Source: Royal Society of Chemistry journal article supplement (doi:10.1039/c6ra26948f), 2017-01-01
Supplement: c6ra26948f1.pdf [file c6ra26948f1.pdf]

## Solvothermal synthesis of magnetic $\text{CoFe}_2\text{O}_4/\text{rGO}$ nanocomposites

### with highly effective for dye removal in wastewater

Wenzhu Yin<sup>a</sup>, Shuo Hao<sup>a,b</sup>, Huaqiang Cao<sup>a\*</sup>

<sup>a</sup> Department of chemistry, Tsinghua University, Beijing 100084, P. R. China

<sup>b</sup> College of Chemistry and Molecular Engineering, Zhengzhou University, Zhengzhou 450001, P R China

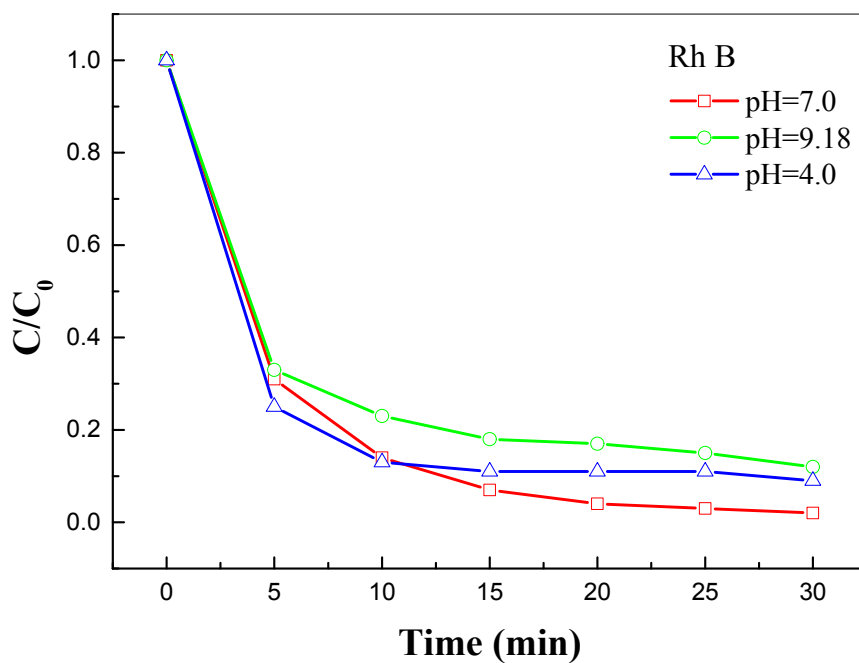

Fig S1  $C/C_0$  versus time plots for Rh B solutions at different pH values condition

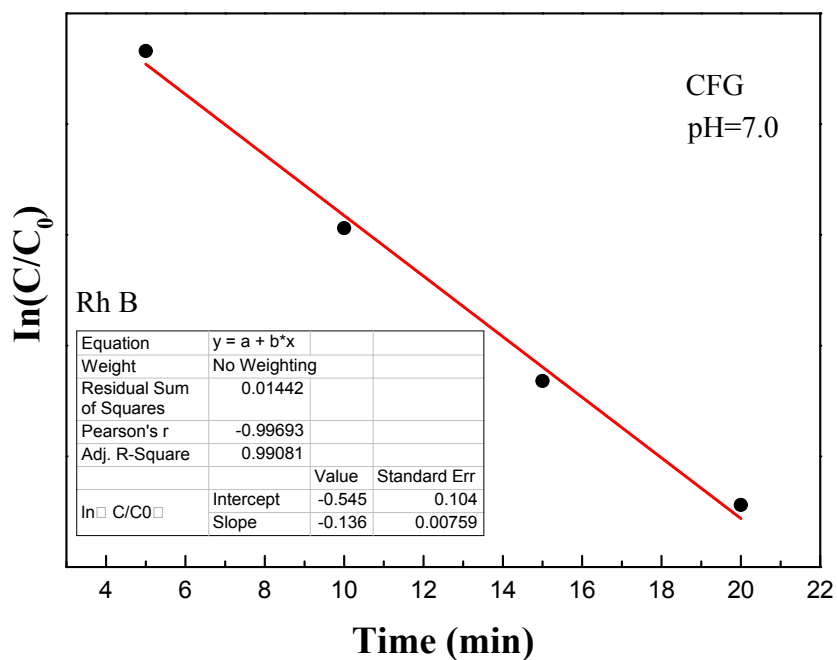

Fig S2 Pseudo-first-order kinetics for adsorption of Rh B solution (220 mL, 10  $\mu$ M) at pH=7 condition.

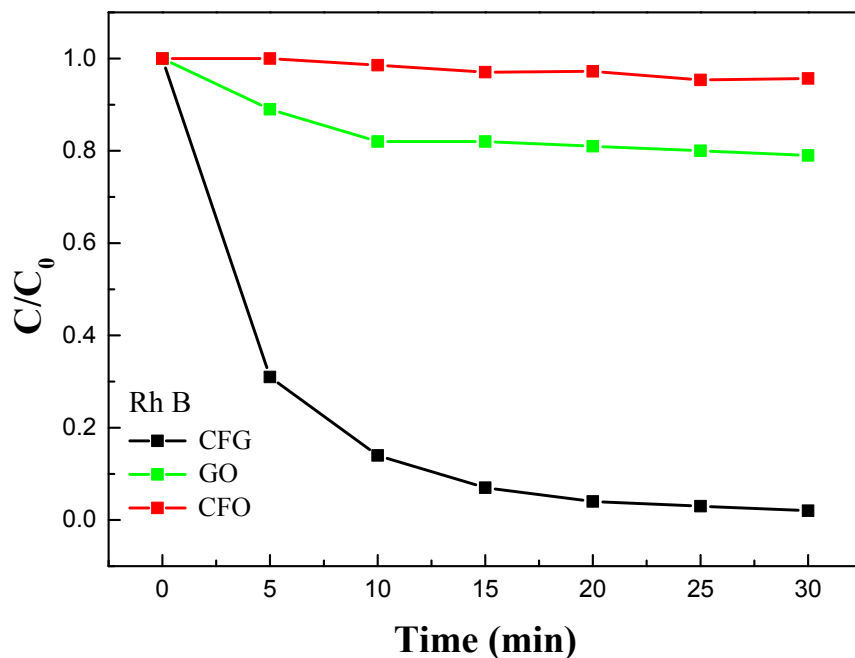

Fig. S3 Time-dependent removal of Rh B (220 mL, 10  $\mu$ M) by CFG, GO and CFO at pH=7 condition

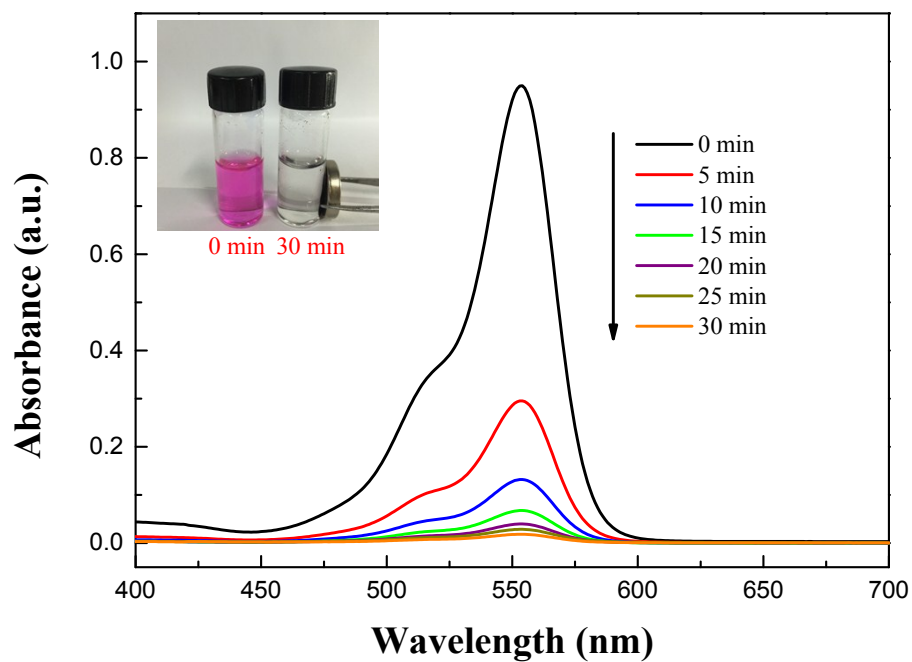

Fig. S4 Time-dependent removal of Rh B by CFG. Inset: The images of absorb Rh B in 0 min (left) and 30 min (right)
